# Supplementary material
Source: PubMed Central journal article supplement (PMC2787818)

**(a)**

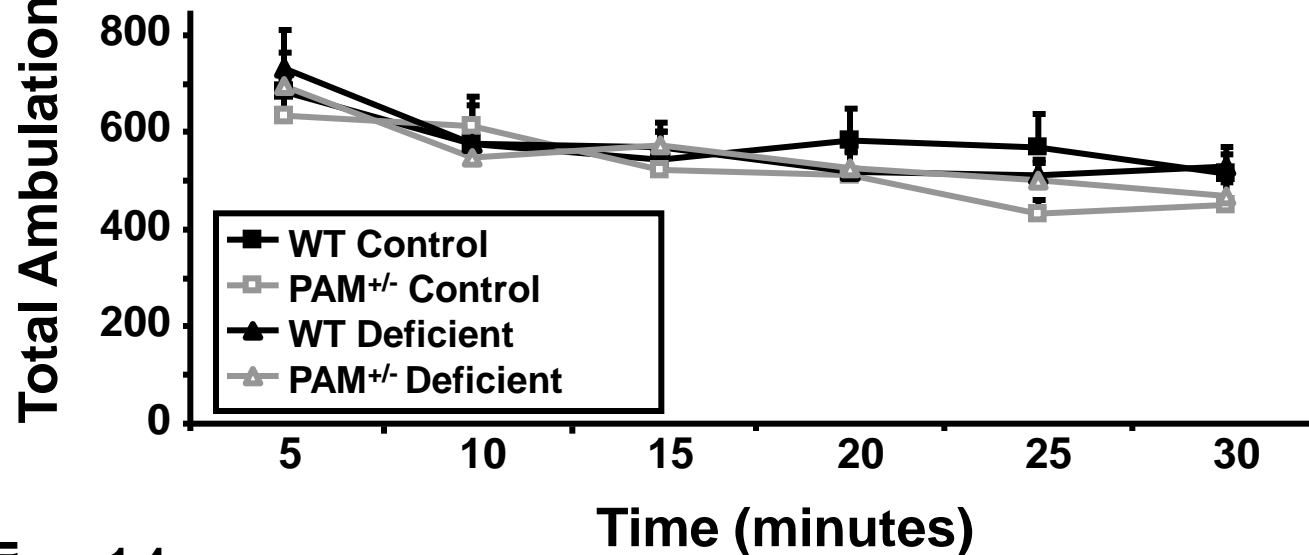

**(b)**

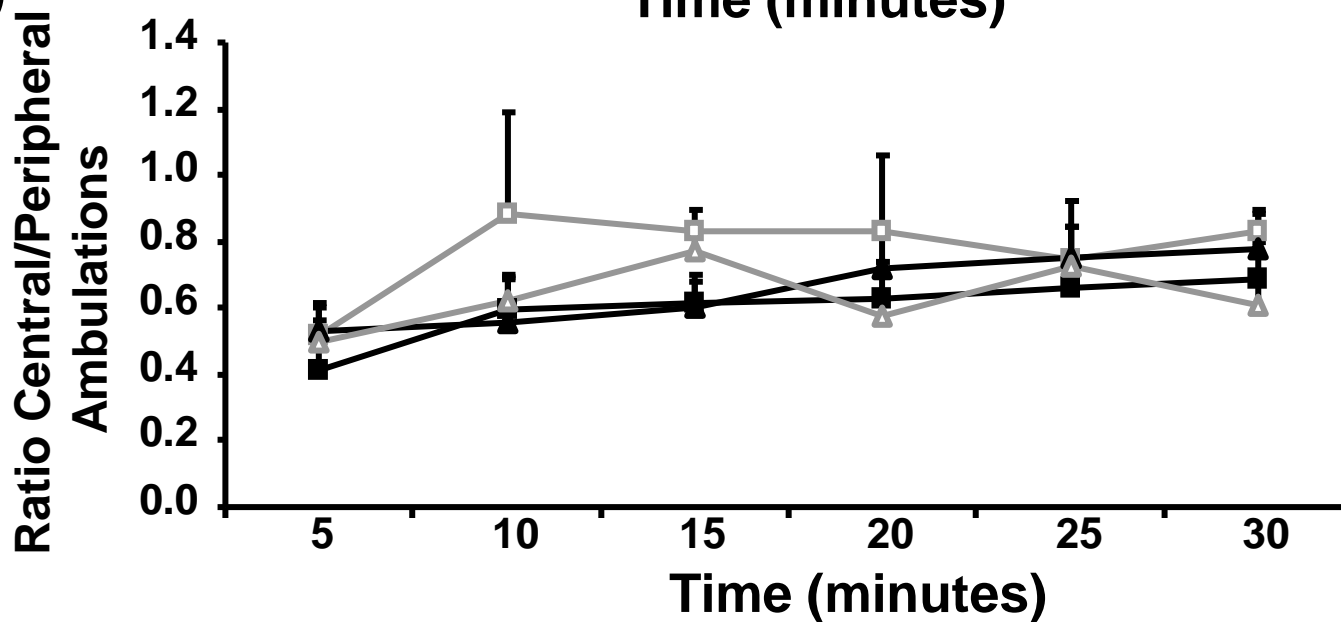

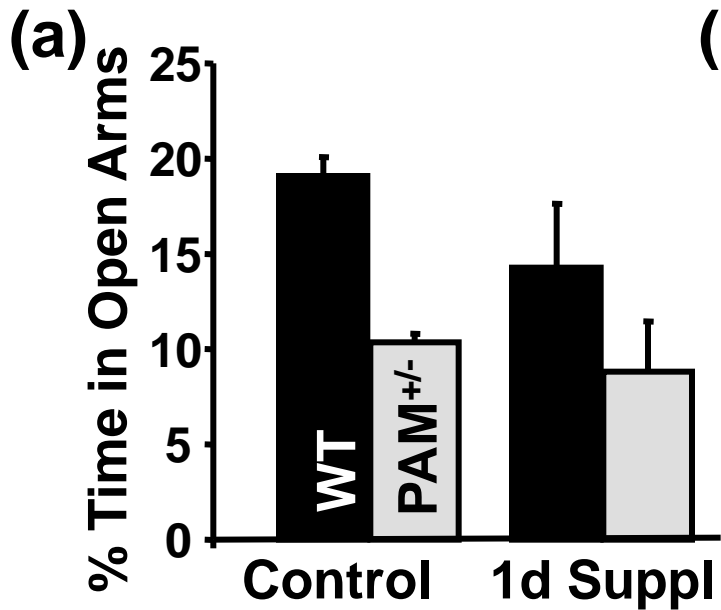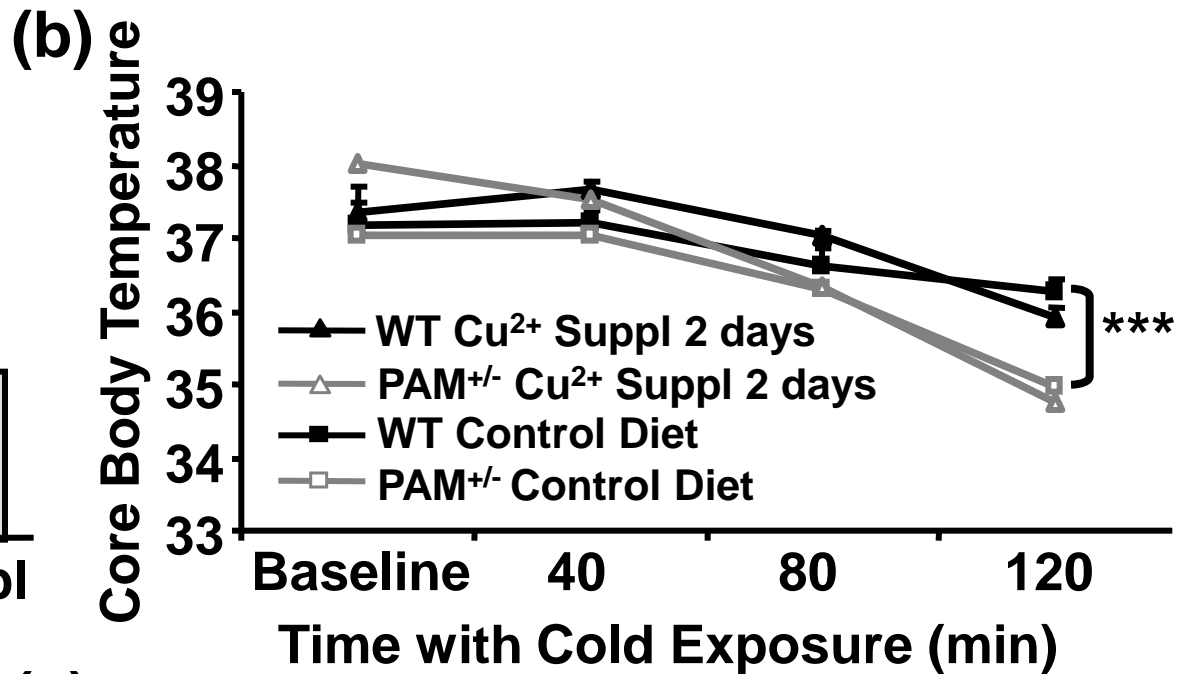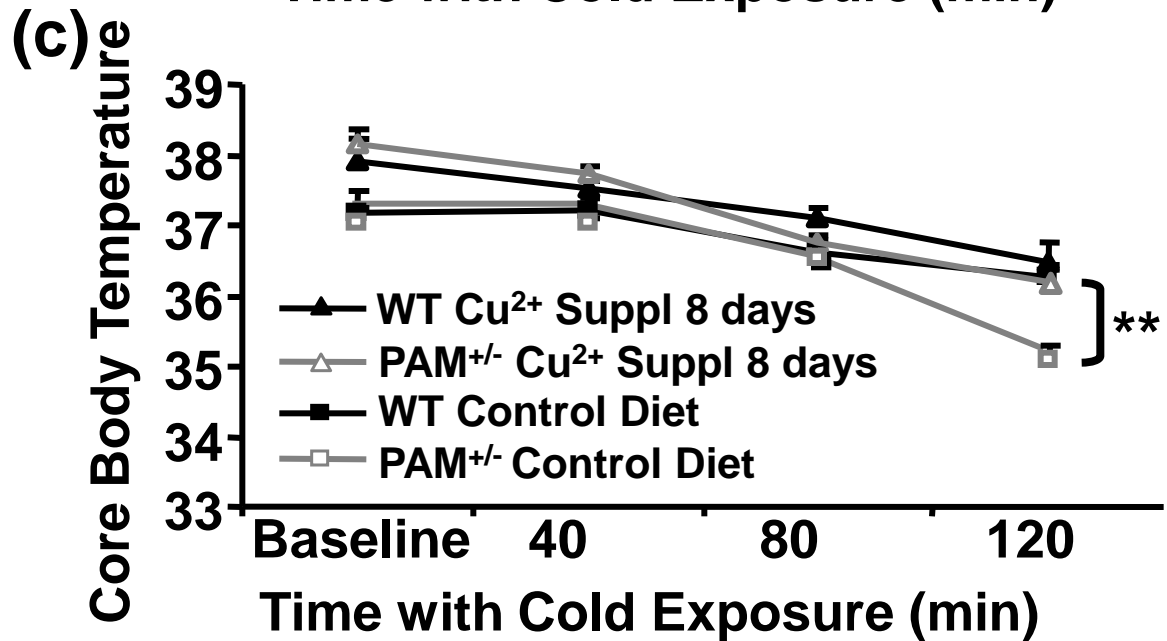

Supplemental  
Figure 2

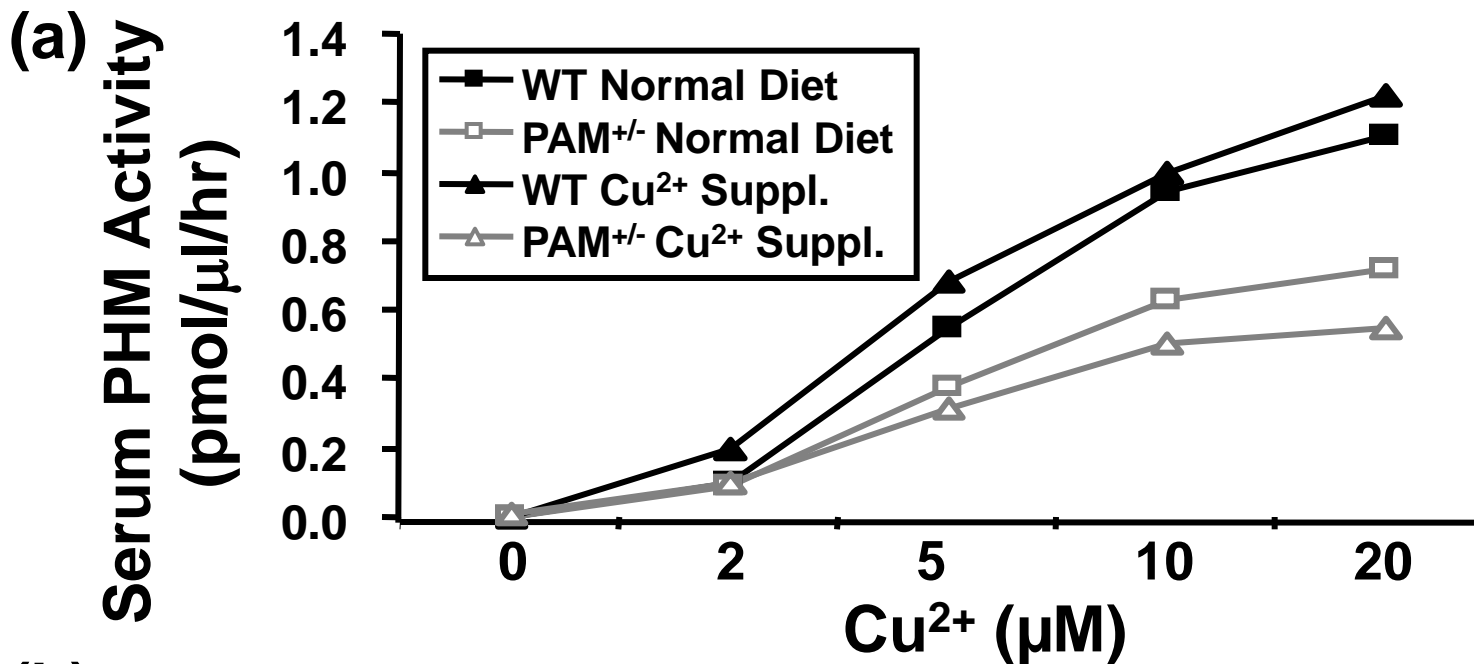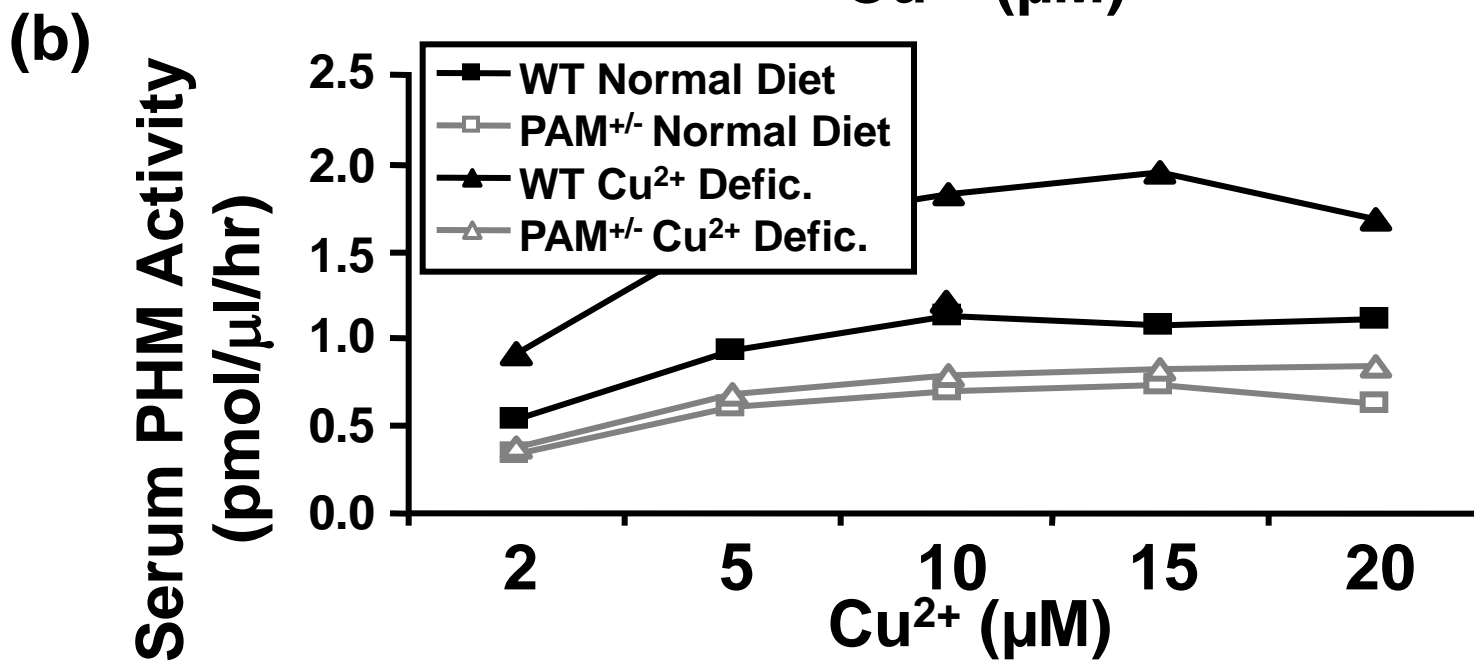

**(a)**

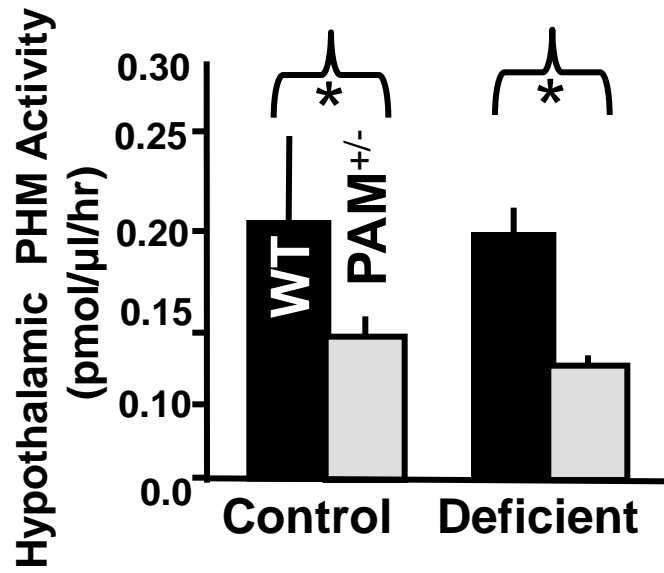

**(b)**

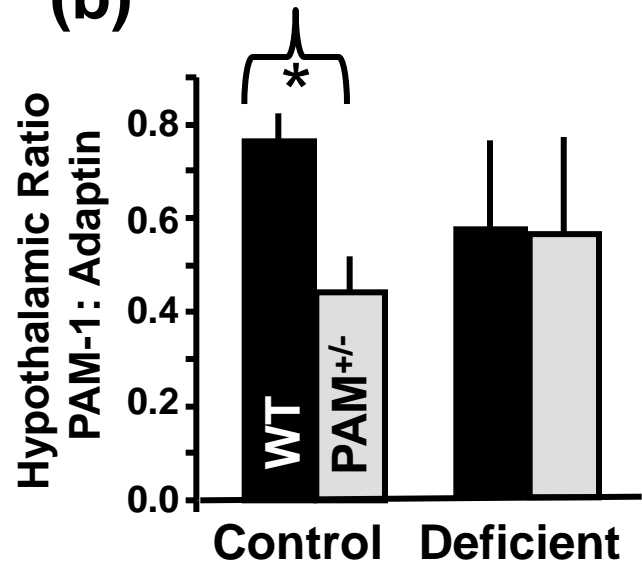

**Control Deficient**

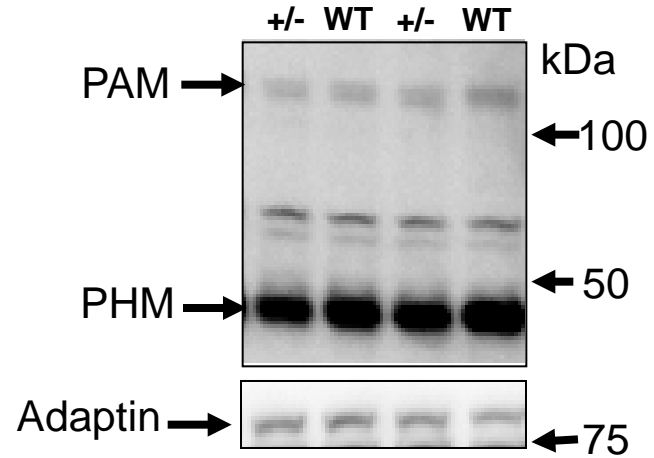

Supplement: NIHMS151374-supplement-02.pdf [file NIHMS151374-supplement-02.pdf]
